# Supplementary material for: A Multidisciplinary Structural Approach to the Identification of the Haemophilus influenzae Type b Capsular Polysaccharide Protective Epitope
Source: PubMed Central journal article supplement (PMC11117310; doi:10.1021/acscentsci.3c01515), 2024-02-22
Supplement: oc3c01515_si_001.pdf [file oc3c01515_si_001.pdf]

1 **SUPPORTING INFORMATION (SI)**

2  
3 **A multidisciplinary structural approach for the identification of *Haemophilus influenzae* type b**  
4 **capsular polysaccharide protective epitope**

5 Francesca Nonne<sup>a</sup>, Lucia Dello Iacono<sup>b</sup>, Sara Bertuzzi<sup>c</sup>, Luca Unione<sup>c,d</sup>, Daniela Proietti<sup>b</sup>, Nathalie Norais<sup>b</sup>,  
6 Immaculada Margarit<sup>b</sup>, Roberto Adamo<sup>b</sup>, Jesús Jiménez-Barbero<sup>c,d,e,f</sup>, Filippo Carboni<sup>b</sup>, Maria Rosaria  
7 Romano<sup>b\*</sup>

8 **Affiliation**

9 <sup>a</sup> GSK Vaccines Institute for Global Health, Siena, Italy

10 <sup>b</sup> GSK, Siena, Italy

11 <sup>c</sup> CIC bioGUNE, Basque Research Technology Alliance, BRTA, Bizkaia Technology Park, 48160 Derio, Spain

12 <sup>d</sup> IKERBASQUE, Basque Foundation for Science and Technology, Euskadi Plaza 5, 48009 Bilbao, Spain

13 <sup>e</sup> Department of Organic & Inorganic Chemistry, Faculty of Science and Technology, University of the Basque  
14 Country, 48940 Leioa, Spain

15 <sup>f</sup> Centro de Investigación Biomédica En Red de Enfermedades Respiratorias, Madrid, Spain

16 \*Corresponding Author email: [maria.r.romano@gsk.com](mailto:maria.r.romano@gsk.com)

17  
18  
19 **A.**

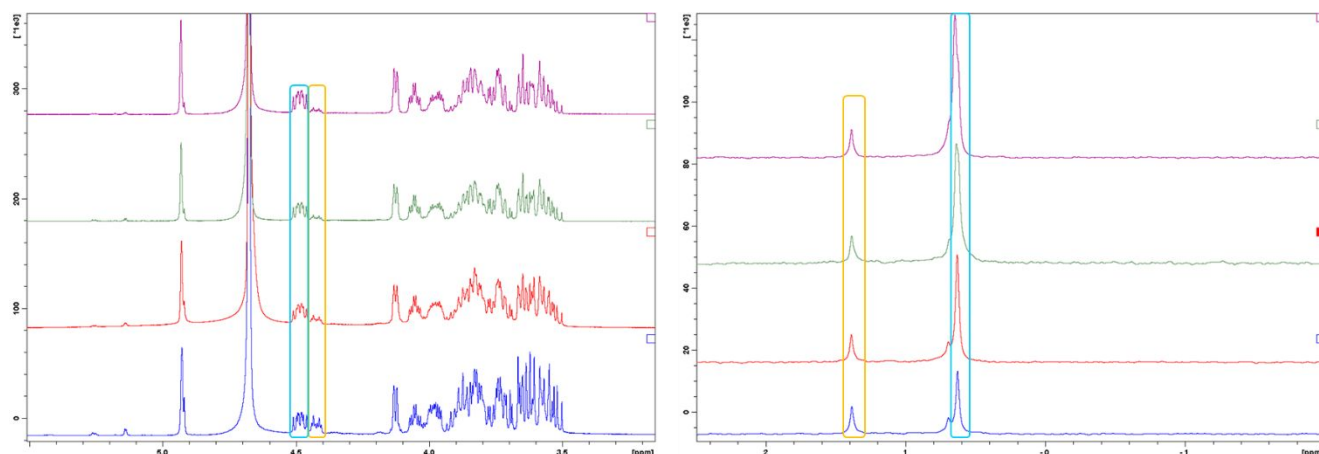

24

25 **B.**

| OS  | Formula                                                        | Exact Mass | Calculated [M-H] <sup>-1</sup> | Detected [M-H] <sup>-1</sup> | Calculated [M-2H] <sup>-2</sup> | Detected [M-2H] <sup>-2</sup> | Calculated [M-3H] <sup>-3</sup> | Detected [M-3H] <sup>-3</sup> | Calculated [M-4H] <sup>-4</sup> | Detected [M-4H] <sup>-4</sup> |
|-----|----------------------------------------------------------------|------------|--------------------------------|------------------------------|---------------------------------|-------------------------------|---------------------------------|-------------------------------|---------------------------------|-------------------------------|
| DP2 | C <sub>20</sub> H <sub>40</sub> O <sub>23</sub> P <sub>2</sub> | 710.14     | 709.14                         | 709.13                       | 354.06                          | 354.06                        | 235.71                          | n.d.                          | 176.53                          | n.d.                          |
| DP3 | C <sub>30</sub> H <sub>59</sub> O <sub>34</sub> P <sub>3</sub> | 1056.21    | 1055.20                        | 1055.20                      | 527.10                          | 527.10                        | 351.06                          | 351.06                        | 263.04                          | n.d.                          |
| DP4 | C <sub>40</sub> H <sub>78</sub> O <sub>45</sub> P <sub>4</sub> | 1402.28    | 1401.27                        | 1401.25*                     | 700.13                          | 700.13                        | 466.42                          | 466.42                        | 349.56                          | 349.53                        |
| DP5 | C <sub>50</sub> H <sub>97</sub> O <sub>56</sub> P <sub>5</sub> | 1748.34    | 1747.34                        | 1747.34*                     | 873.16                          | 873.16                        | 581.77                          | 581.78                        | 436.08                          | 436.07                        |

26 n.d.=not detected

27 \*obtained from the deconvoluted spectrum

28

29 **Figure S1. A)** <sup>1</sup>H-NMR spectra (left) and <sup>31</sup>P-NMR spectra (right) of the produced Hib oligosaccharide fragments: DP2  
30 (blue), DP3 (red), DP4 (green), DP5 (purple). Signals of H3-ribose within the chain and at the reducing terminal units are  
31 indicated in light blue and yellow boxes, respectively (left panel). The relative intensity of the reducing terminal H3-ribose  
32 signal decreased with increasing chain length. Signals of phosphate groups of terminal RU and within the chain are circled  
33 yellow and light blue, respectively (right panel). **B)** DP2-DP5 mass detected by negative mode ESI-MS.

34

35 A.

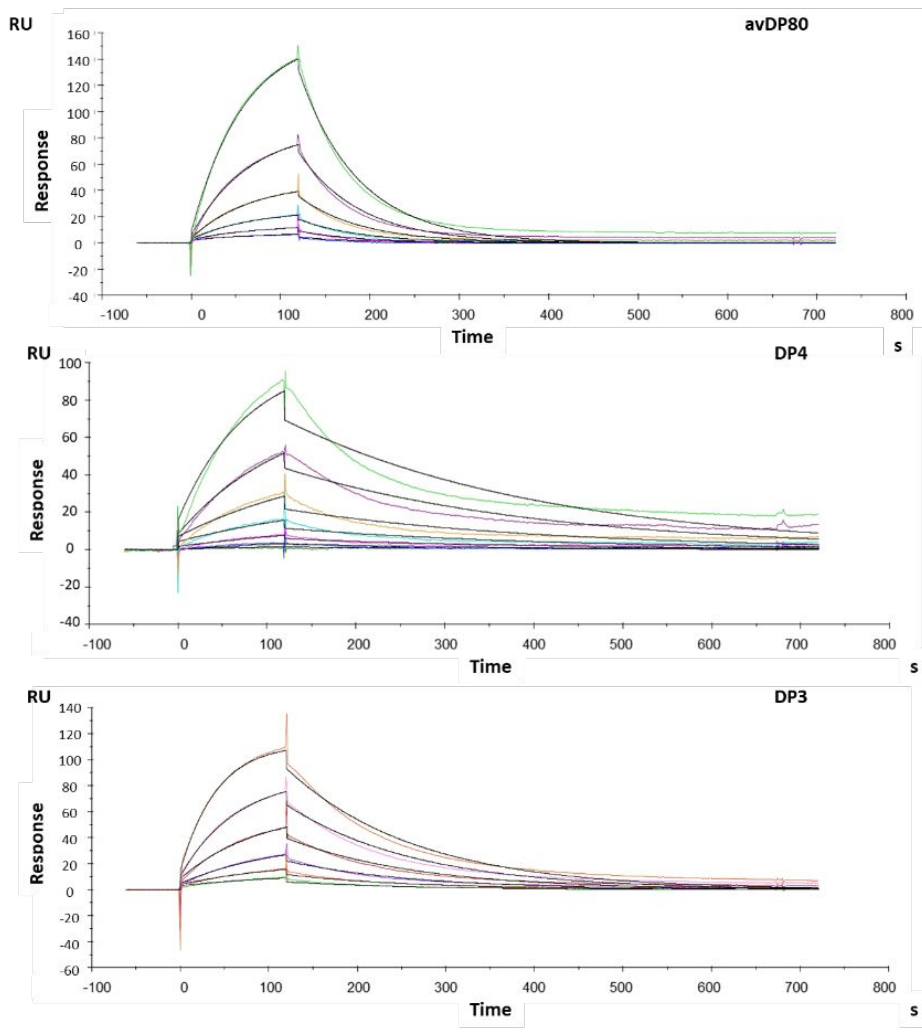

36 B.

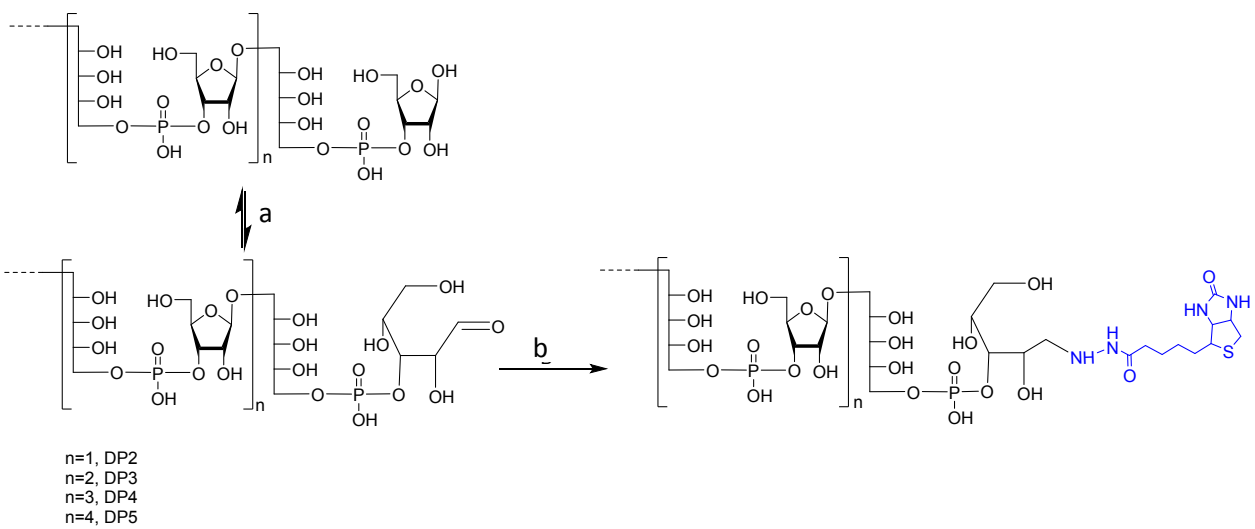

37 **Figure S2. A)** Binding kinetics of Fab CA4 to avDP80, DP4 and DP3 fragments by SPR. **B)** Sugar forms in water [25] (a)  
 38 and biotinylation (b)  
 39

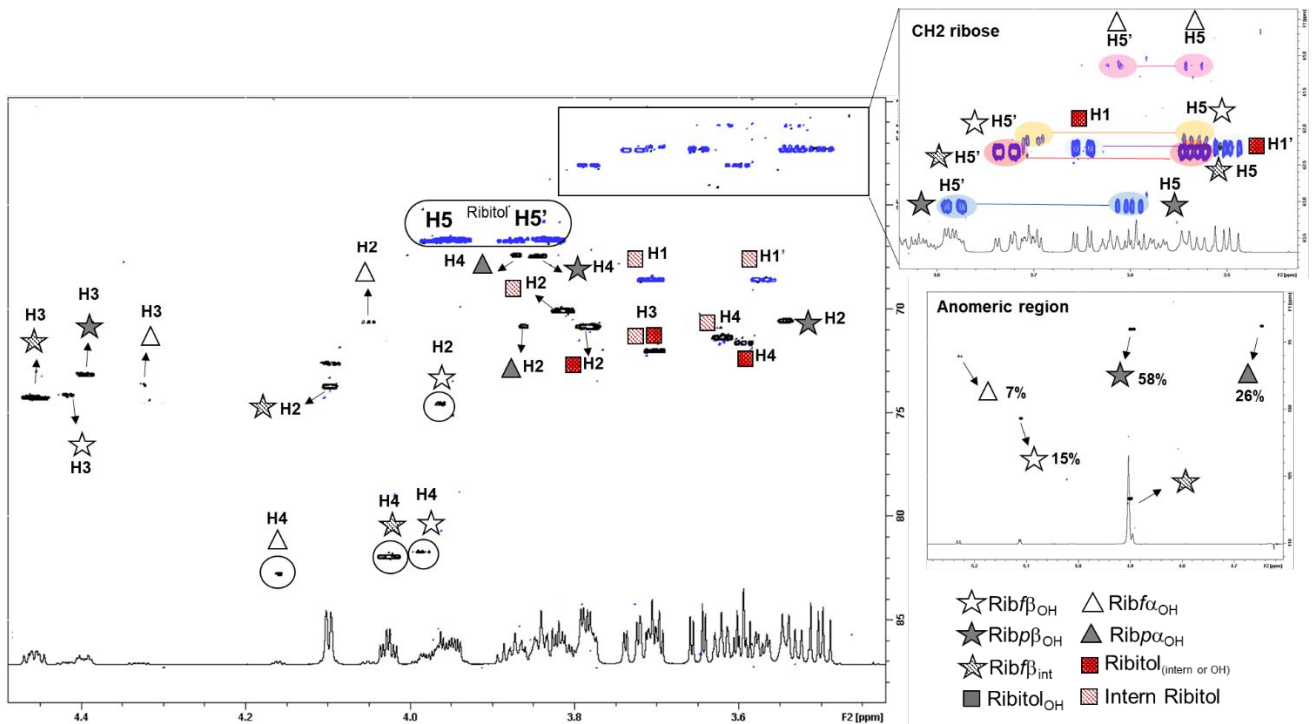

40

41

42

43

44

**Figure S3.**  $^1\text{H}$ - $^{13}\text{C}$  full HSQC spectrum of Hib DP3 1 mM in  $\text{D}_2\text{O}$  with the relative peak assignment. The experiment was acquired with 500  $\mu\text{L}$  of sample transferred into a 5 mm NMR tube. The assignment for Hib DP2 is identical to the one here reported for DP3.

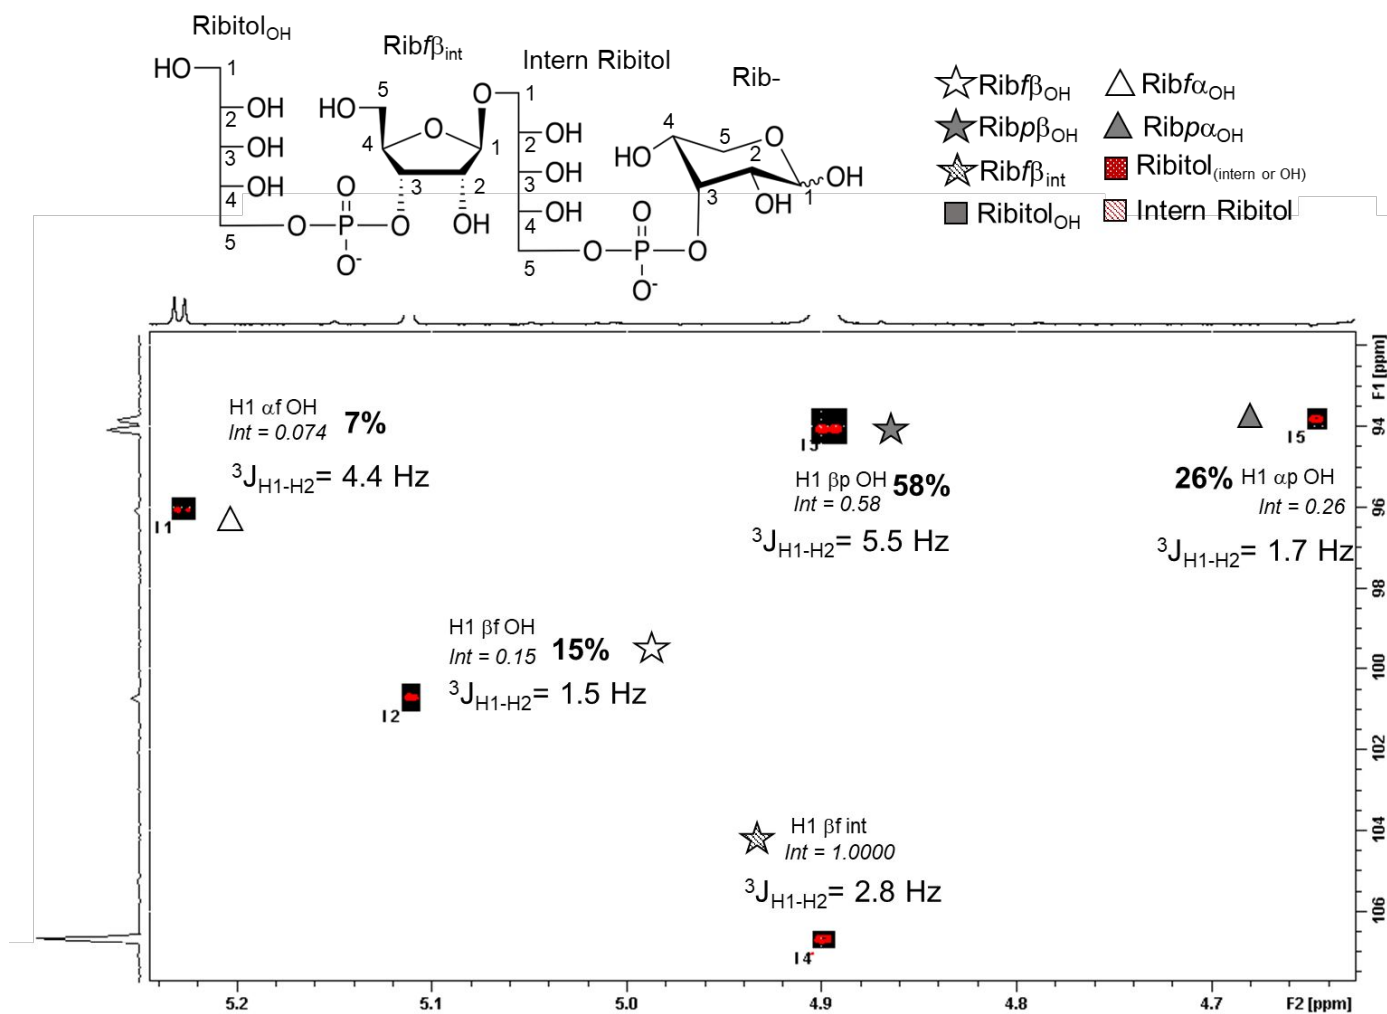

45

46 **Figure S4.** Zoom of the  $^1\text{H}$ - $^{13}\text{C}$  HSQC spectrum of Hib DP3 1 mM in  $\text{D}_2\text{O}$  on the anomeric region. The peak assignment  
 47 is reported, together with the calculated  $^3J_{\text{H1-H2}}$  couplings, the integrals for each signal and the relative percentage for each  
 48 anomer. The experiment was acquired with 500  $\mu\text{L}$  of sample transferred into a 5 mm NMR tube.

49

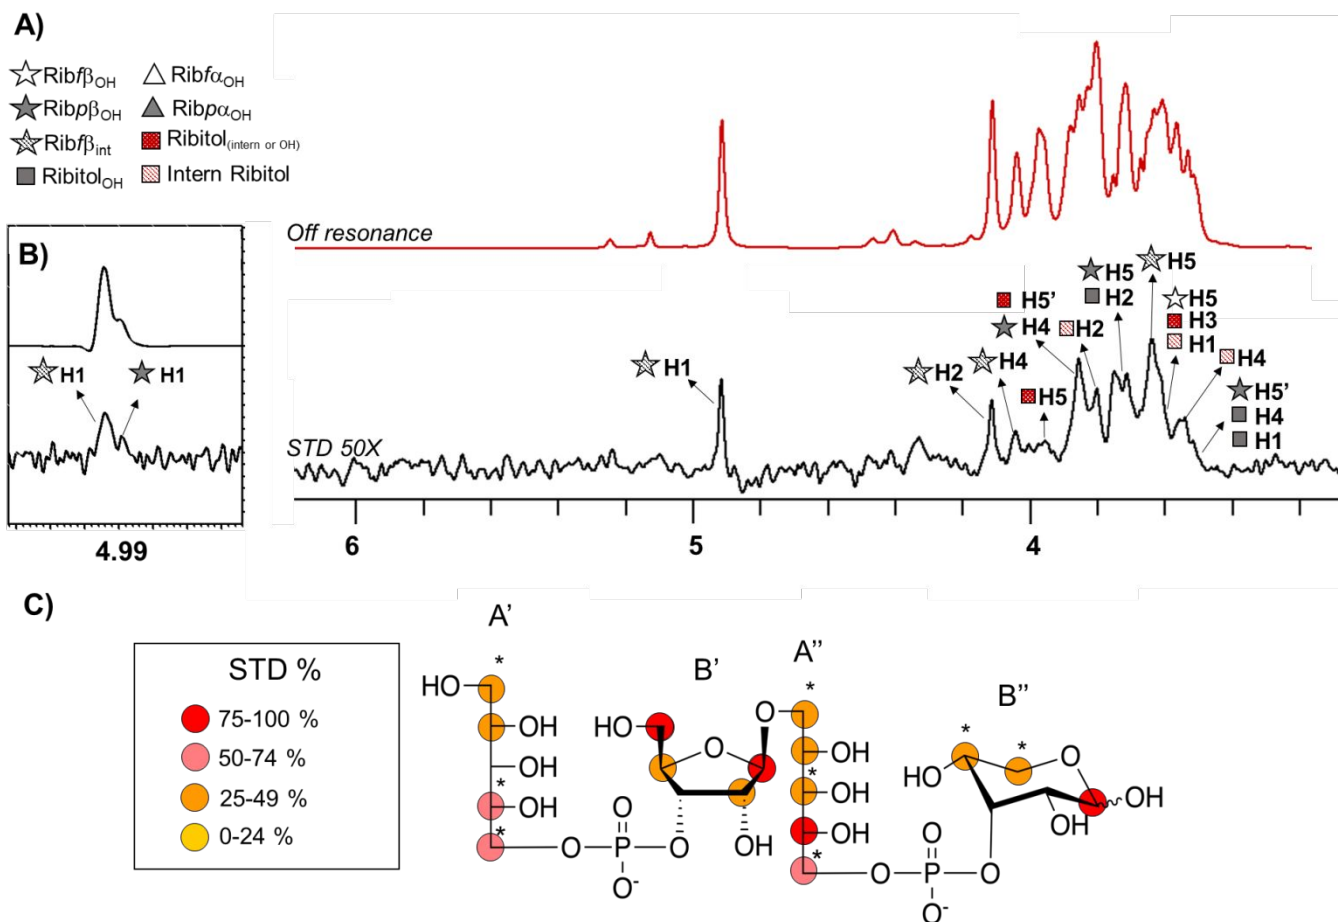

50

51 **Figure S5. A)** STD NMR experiments performed for the complex Hib DP2-CA4 hmAb.  
 52 at  $\delta$  100 ppm, top panel) and STD spectra obtained from aliphatic irradiation ( $\delta$  0.6 ppm) and processed applying  
 53 exponential line-broadening. The main  $^1\text{H}$  NMR signals are annotated in the STD spectrum and the pictorial notation for  
 54 each residue is reported. The antibody/ligand molar ratio was 1:50, with the CA4 hmAb being at a concentration of 10  $\mu\text{M}$ .  
 55 The STD NMR experiments were acquired with 2 s of saturation time, 3 s of relaxation delay, and 2880 scans at 298 K. **B)**  
 56 Expansion of the STD in the anomeric region of protons H1 Ribβ<sub>int</sub> and Ribβ<sub>OH</sub> processed omitting the exponential  
 57 multiplication for resolution enhancement. **C)** Representation of the epitope map disclosed by the analysis of the STD-  
 58 NMR experiments of Hib DP2-CA4 hmAb and Hib DP3-CA4 hmAb complexes. The color legend of associated to STD%  
 59 values is also reported.

60

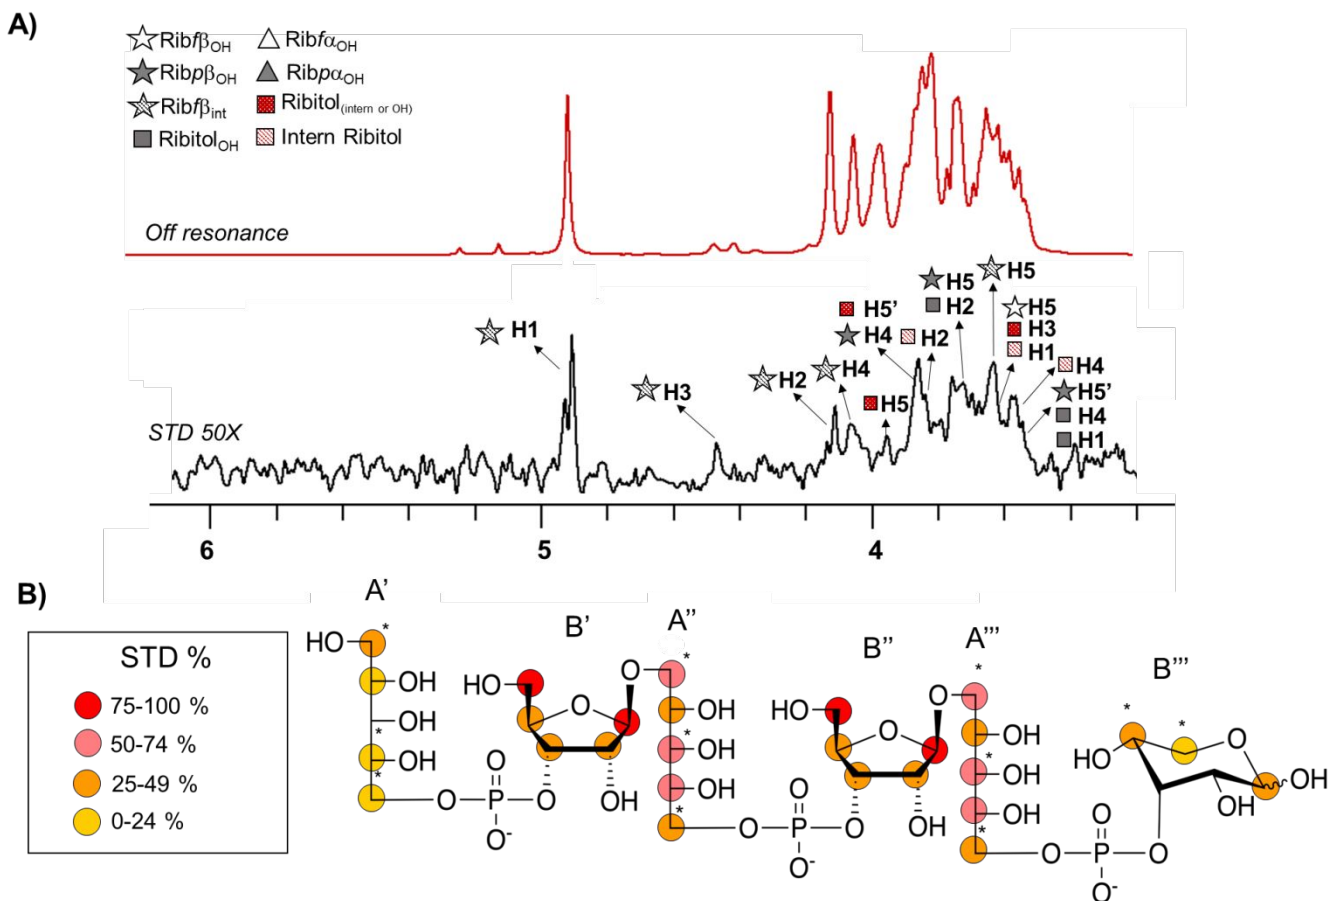

61

62 **Figure S6.** STD NMR experiments performed for the complex Hib DP3-CA4 hmAb. Off-resonance spectrum (irradiation at  
 63  $\delta$  100 ppm, top panel) and STD spectra obtained from aliphatic irradiation ( $\delta$  0.6 ppm) and processed applying exponential  
 64 line-broadening. The main <sup>1</sup>H NMR signals are annotated in the STD spectrum and the pictorial notation for each residue  
 65 is reported. The antibody/ligand molar ratio was 1:50, with the CA4 hmAb being at a concentration of 10  $\mu$ M. The STD  
 66 NMR experiments were acquired with 2 s of saturation time, 3 s of relaxation delay, and 2880 scans at 298 K. **B)**  
 67 Representation of the epitope map disclosed by the analysis of the STD-NMR experiments of Hib DP3-CA4 hmAb and Hib  
 68 DP3-CA4 hmAb complexes. The color legend associated to the STD% values is also reported.

69

70

A)

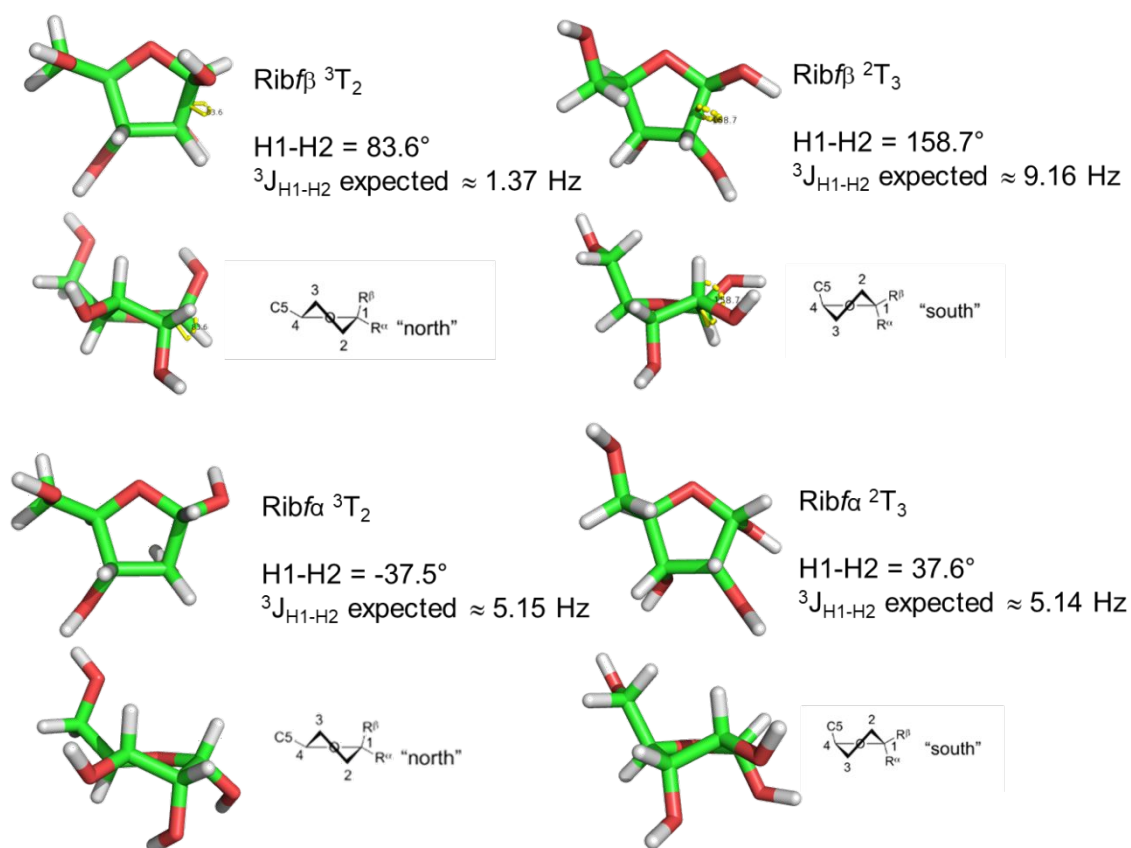

71

B)

72

73

74

75

76

77

78

79

80

81

|                                 | Experimental<br>$^3J_{H1-H2}$ | $p_{Rf\beta}$<br>3T2 | $p_{Rf\beta}$<br>2T3 |
|---------------------------------|-------------------------------|----------------------|----------------------|
| <i>Internal</i><br>Ribf $\beta$ | 2.8 Hz                        | 0.82                 | 0.18                 |
| <i>Reducing</i><br>Ribf $\beta$ | 1.5 Hz                        | 0.98                 | 0.02                 |

|                                  | Experimental<br>$^3J_{H1-H2}$ | $p_{Rf\beta}$<br>3T2 | $p_{Rf\beta}$<br>2T3 |
|----------------------------------|-------------------------------|----------------------|----------------------|
| <i>Reducing</i><br>Ribf $\alpha$ | 4.4 Hz                        | 0.5                  | 0.5                  |

82 **Figure S7. A)** Study of the interconversion of ring conformations performed through J coupling analysis. Representation  
 83 of the possible  $^3T_2$  and  $^2T_3$  conformations for Ribf $\beta$  (on the left) and Ribf $\alpha$  (on the right) with the  $^3J_{H1-H2}$  expected values  
 84 reported. **B)** Table reporting the measured experimental  $^3J_{H1-H2}$  and the relative population for each moiety.

85



86

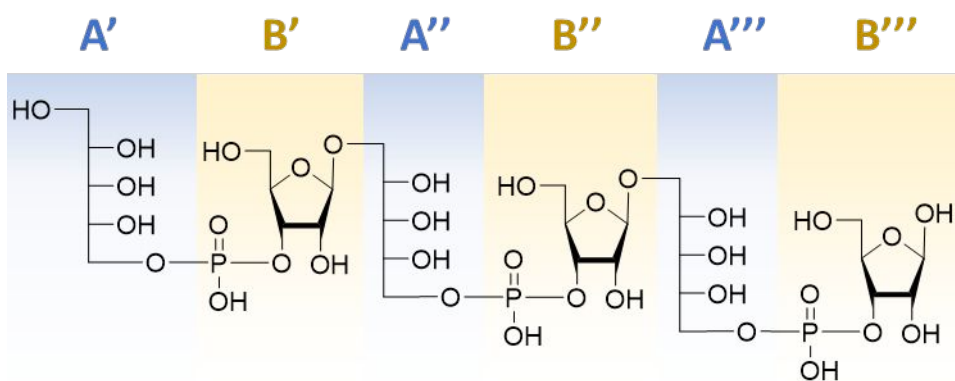

87

88 **Figure S8.** Ribitol and Ribose moieties of the DP3 fragment are individually indicated as A', B', A'', B'', A''', B''' starting  
89 from the Ribitol of the first repeating unit.

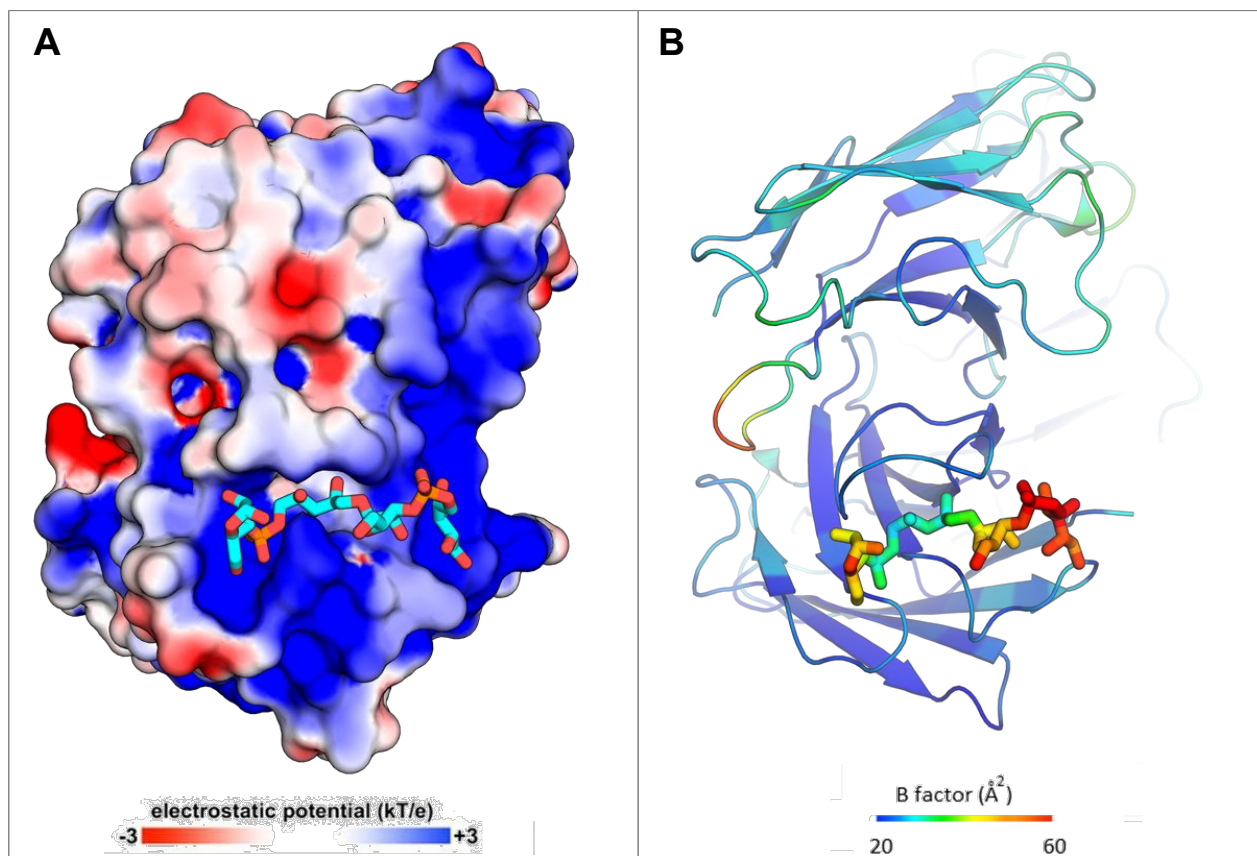

90

91 **Figure S9. A)** Electrostatic surface representation of the Fab CA4 (ranging from  $-3$  kT/e [red] to  $+3$  kT/e [blue]), calculated  
 92 by APBS (adaptive Poisson-Boltzmann solver) methods [59] using Pymol. **B)** B-Factor values for Fab and Hib DP2.  
 93 Crystallographic B factors represent temperature-dependent vibrations from average atomic positions. The color bar  
 94 ranges from low B factor (blue, less flexible) to high B factor (red, more flexible).

95

96  
97  
98  
99  
100  
101  
102  
103  
104  
105  
106  
107  
108  
109  
110  
111  
112  
113  
114  
115  
116  
117  
118  
119  
120  
121  
122  
123

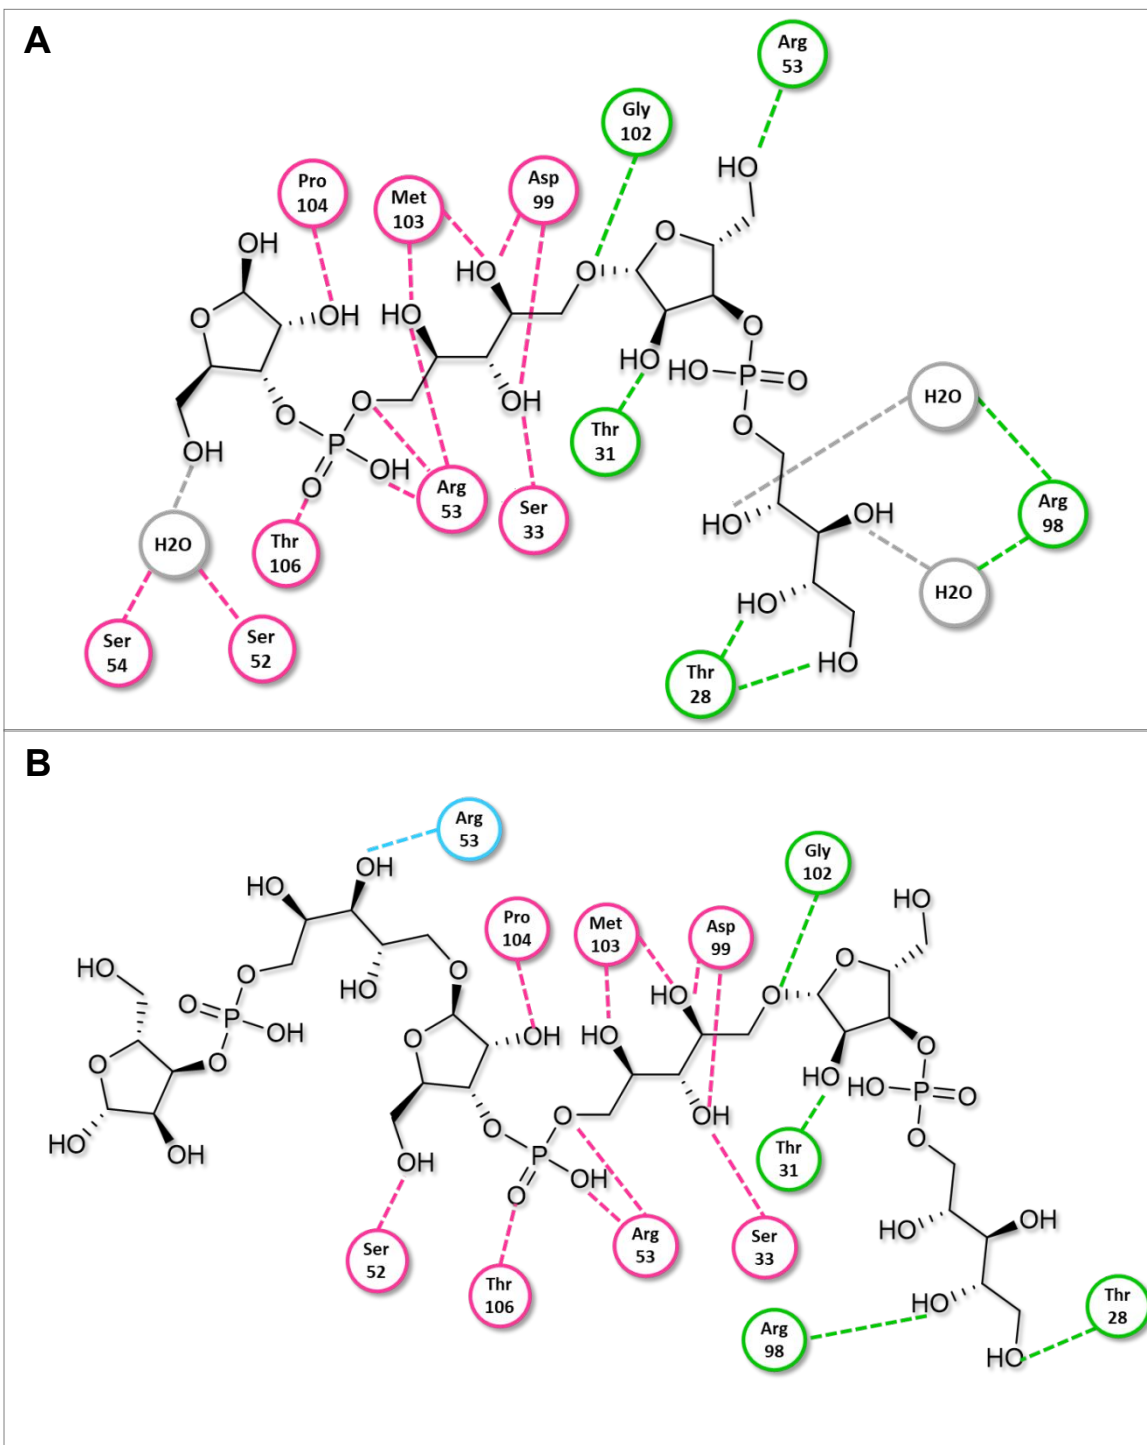

124 **Figure S10.** Schematic representation of DP2 (**A**) and DP3 (**B**) interactions. Hydrogen bonds are indicated by dotted lines.  
125 Interactions of the OS fragments with Fab residues are shown in green (Rib-ol A'-Ribf B'), pink (Rib-ol A''-Ribf B'') and light  
126 blue (Rib-ol A'''-Ribf B'''). Water-mediated interactions are represented in grey.

127 **Table S1.** Data collection and refinement statistics

|                                                     | <b>Fab CA4-DP2</b><br>(PDB id 8RDA) | <b>Fab CA4-DP3</b><br>(PDB id 8RDF) |
|-----------------------------------------------------|-------------------------------------|-------------------------------------|
| <b>Crystal</b>                                      |                                     |                                     |
| Space group                                         | C 2 2 2 <sub>1</sub>                | C 2 2 2 <sub>1</sub>                |
| Cell dimensions<br><i>a, b, c</i> (Å)               | 60.66, 131.59, 145.1                | 60.80, 131.22, 144.95               |
| <b>Data collection<sup>a</sup></b>                  |                                     |                                     |
| Beamline                                            | DLS I03                             | ESRF ID30A-1                        |
| Wavelength (Å)                                      | 0.976                               | 0.965                               |
| Resolution (Å)                                      | 51.50-2.29 (2.33-2.29)              | 65.64- 2.74 (2.87-2.74)             |
| Total reflections                                   | 207267 (5801)                       | 53118 (6956)                        |
| Unique reflections                                  | 26582 (1252)                        | 15060 (2007)                        |
| <i>R</i> <sub>merge</sub>                           | 0.16 (1.16)                         | 0.18 (0.94)                         |
| <i>R</i> <sub>meas</sub>                            | 0.19 (1.45)                         | 0.21 (1.11)                         |
| <i>I</i> /σ( <i>I</i> )                             | 7.3 (1.1)                           | 5 (1.2)                             |
| <i>CC</i> <sub>1/2</sub>                            | 0.99 (0.38)                         | 0.94 (0.58)                         |
| Completeness (%)                                    | 99.7 (93.4)                         | 96.8 (98.1)                         |
| Redundancy                                          | 7.8 (4.6)                           | 3.5 (3.5)                           |
| Wilson B-factor (Å)                                 | 37.09                               | 36.55                               |
| <b>Refinement</b>                                   |                                     |                                     |
| Resolution (Å)                                      | 51.50-2.29                          | 65.64-2.74                          |
| No. reflections                                     | 26531                               | 14988                               |
| <i>R</i> <sub>work</sub> / <i>R</i> <sub>free</sub> | 22.6/27                             | 22.6/27.7                           |
| No. atoms                                           |                                     |                                     |
| Protein                                             | 3307                                | 3282                                |
| Ligands                                             | 50                                  | 68                                  |
| Water                                               | 114                                 | 54                                  |
| <i>B</i> factors                                    |                                     |                                     |
| Protein (Heavy/ Light chains)                       | 43.78/ 47.96                        | 40.88/46.20                         |
| Ligand (carbohydrate)                               | 65.57                               | 52.44                               |
| Water                                               | 44.17                               | 37.40                               |
| R.m.s. deviations                                   |                                     |                                     |
| Bond lengths (Å)                                    | 0.002                               | 0.003                               |
| Bond angles (°)                                     | 0.62                                | 0.69                                |
| Clash scores                                        | 3.2                                 | 7.2                                 |
| Ramachandran <sup>#</sup>                           |                                     |                                     |
| Favored (%)                                         | 96.53                               | 95.08                               |
| Allowed (%)                                         | 3.24                                | 3.98                                |

<sup>a</sup> Values in parentheses are for highest-resolution shell<sup>#</sup> Measured using Molprobity128  
129  
130
